# Supplementary material
Source: Springer Nature journal article supplement (https://mijn.bsl.nl/resource/supplementary/13047_2011_352_MOESM1_ESM.PDF/7110656)
Supplement: MOESM1 [file 7110656]

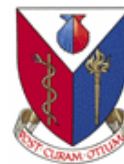

## PASCOM Patient Satisfaction Questionnaire (P.S.Q 10)

|                                                                                                                                                                 |                                                                                                                                                                                                                                                                                                                                                                                                                                                   |
|-----------------------------------------------------------------------------------------------------------------------------------------------------------------|---------------------------------------------------------------------------------------------------------------------------------------------------------------------------------------------------------------------------------------------------------------------------------------------------------------------------------------------------------------------------------------------------------------------------------------------------|
| <b>Name :</b>                                                                                                                                                   | <b>Operation date :</b>                                                                                                                                                                                                                                                                                                                                                                                                                           |
| 1. Briefly state what you expected to gain from treatment, in the space provided below.                                                                         |                                                                                                                                                                                                                                                                                                                                                                                                                                                   |
| 2. Were the risks and possible complications of surgery explained to ...<br>you, before you had your operation?                                                 | <input type="checkbox"/> Yes<br><input type="checkbox"/> Not sure<br><input type="checkbox"/> No                                                                                                                                                                                                                                                                                                                                                  |
| 3. Did you know what to do if you had a problem after your operation?                                                                                           | <input type="checkbox"/> Yes<br><input type="checkbox"/> Not sure<br><input type="checkbox"/> No                                                                                                                                                                                                                                                                                                                                                  |
| 4. Did you have a problem after your operation?<br>(if you answered 'No', then go straight to question 5 overleaf,<br>otherwise answer questions 4a – 4d below) | <input type="checkbox"/> No<br><input type="checkbox"/> Yes, a minor problem<br><input type="checkbox"/> Yes, a major problem                                                                                                                                                                                                                                                                                                                     |
| 4a. When you had your problem, how did you seek help?                                                                                                           | <input type="checkbox"/> I waited until my next appointment and raised it then<br><input type="checkbox"/> I telephoned for help and was given an earlier appointment<br><input type="checkbox"/> I called the Podiatrist out<br><input type="checkbox"/> I contacted the Podiatrist who gave me advice over the telephone<br><input type="checkbox"/> I attended my local hospital casualty department<br><input type="checkbox"/> Other (state) |
| 4b. If you rang the Podiatry Department, when did you call?<br>(Ignore this question if you did not telephone for help)                                         | <input type="checkbox"/> 9 am - midday<br><input type="checkbox"/> Midday to 5 pm<br><input type="checkbox"/> 5 pm to 9 am                                                                                                                                                                                                                                                                                                                        |
| 4c. If you rang the Podiatry Department, how did you find the speed of response? (Ignore this question if you did not telephone for help)                       | <input type="checkbox"/> Slow to respond<br><input type="checkbox"/> Satisfactory<br><input type="checkbox"/> Fast to respond                                                                                                                                                                                                                                                                                                                     |
| 4d. Overall how would you say your problem was dealt with?                                                                                                      | <input type="checkbox"/> Poorly<br><input type="checkbox"/> Cannot say as problem is still being managed<br><input type="checkbox"/> Satisfactorily<br><input type="checkbox"/> Excellently                                                                                                                                                                                                                                                       |
| Please turn over and complete the questions on the other side                                                                                                   |                                                                                                                                                                                                                                                                                                                                                                                                                                                   |

|                                                                                                                                                                                                                                                                                                 |                                                                                                                                                                                                                                                                |
|-------------------------------------------------------------------------------------------------------------------------------------------------------------------------------------------------------------------------------------------------------------------------------------------------|----------------------------------------------------------------------------------------------------------------------------------------------------------------------------------------------------------------------------------------------------------------|
| <b>5. After your operation, how effective was your pain control?</b>                                                                                                                                                                                                                            | <input type="checkbox"/> Pain control did not work<br><input type="checkbox"/> Some pain but I coped<br><input type="checkbox"/> Minimal or no pain                                                                                                            |
| <b>6. When could you get back into your shoes?</b>                                                                                                                                                                                                                                              | <input type="checkbox"/> By two weeks<br><input type="checkbox"/> By four weeks<br><input type="checkbox"/> By six weeks<br><input type="checkbox"/> By eight weeks<br><input type="checkbox"/> By six months<br><input type="checkbox"/> Six months and over  |
| <b>7. Do you still have discomfort from your original foot condition?</b>                                                                                                                                                                                                                       | <input type="checkbox"/> Yes, even whilst at rest<br><input type="checkbox"/> Yes, when standing<br><input type="checkbox"/> Yes, when standing for long periods<br><input type="checkbox"/> Just occasional twinges<br><input type="checkbox"/> No discomfort |
| <b>8. How would you describe your original foot condition since treatment?</b>                                                                                                                                                                                                                  | <input type="checkbox"/> Deteriorated<br><input type="checkbox"/> A little worse<br><input type="checkbox"/> The same<br><input type="checkbox"/> Better<br><input type="checkbox"/> Much better                                                               |
| <b>9. Would you be prepared to have surgery performed under the same conditions again?</b>                                                                                                                                                                                                      | <input type="checkbox"/> Yes<br><input type="checkbox"/> No                                                                                                                                                                                                    |
| <b>10. Were the original expectations that you stated at the beginning of this questionnaire met?</b>                                                                                                                                                                                           | <input type="checkbox"/> Yes<br><input type="checkbox"/> In part<br><input type="checkbox"/> No                                                                                                                                                                |
| <p><b>Thank you for your co-operation in filling in this questionnaire.</b></p> <p><b>The results of our patient surveys are used to improve the quality of service that we provide to our patients and will remain anonymous.</b></p> <p><b>Return your questionnaire to this address:</b></p> |                                                                                                                                                                                                                                                                |
